# Supplementary material for: Single-cell deconvolution reveals high lineage- and location-dependent heterogeneity in mesenchymal multivisceral stage 4 colorectal cancer
Source: JCI journal article supplement (doi:10.1172/jci169576), 2023-12-28
Supplement: sd1 [file 1]

301 Moved Permanently

# Moved Permanently

The document has moved here.
