# Supplementary material for: Single-cell deconvolution reveals high lineage- and location-dependent heterogeneity in mesenchymal multivisceral stage 4 colorectal cancer
Source: JCI journal article supplement (doi:10.1172/jci169576), 2023-12-28
Supplement: sd1 [file 1]

**A** Experimental overview

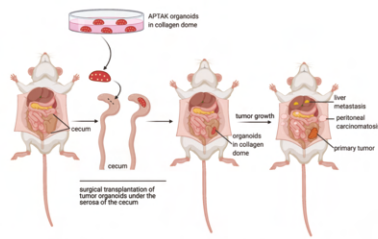

**B**

APTKA organoid preparation

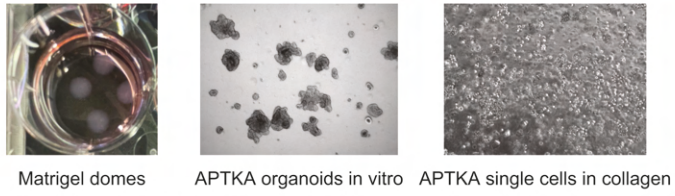

**C** Subserosal surgical transplantation of APTKA organoids into the murine cecum wall

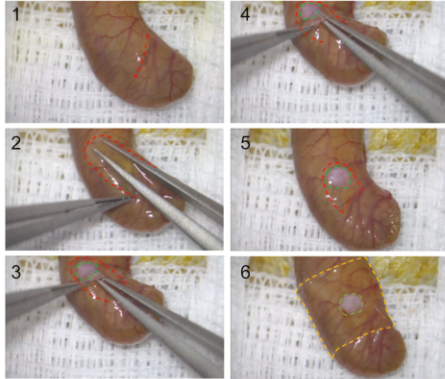

**D** Modified PCI scoring system

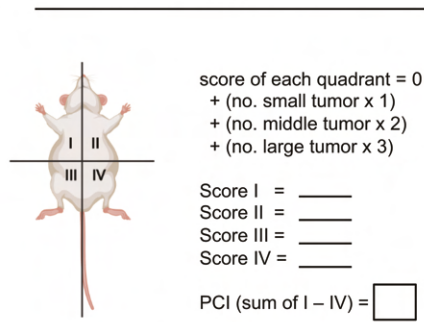

**E** Peritoneal tumour load upon orthotopic APTKA transplantation

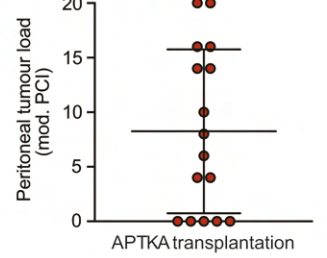

**F** Consensus molecular subtype gene expression profiling

|     | prediction | FDR   |
|-----|------------|-------|
| PT1 | CMS4       | 0.003 |
| PT2 | NA         | 0.057 |
| PT3 | CMS4       | 0.003 |

**G** iCMS of location dependent tumour epithelium

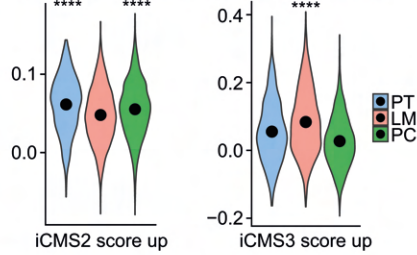

**H** Absolute cellcounts in PT, LM and PC tissue

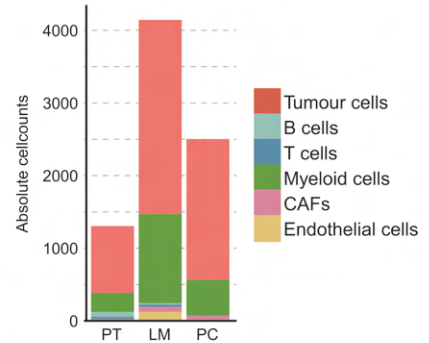

**I** Representative IHC of multivisceral murine APTKA CRC

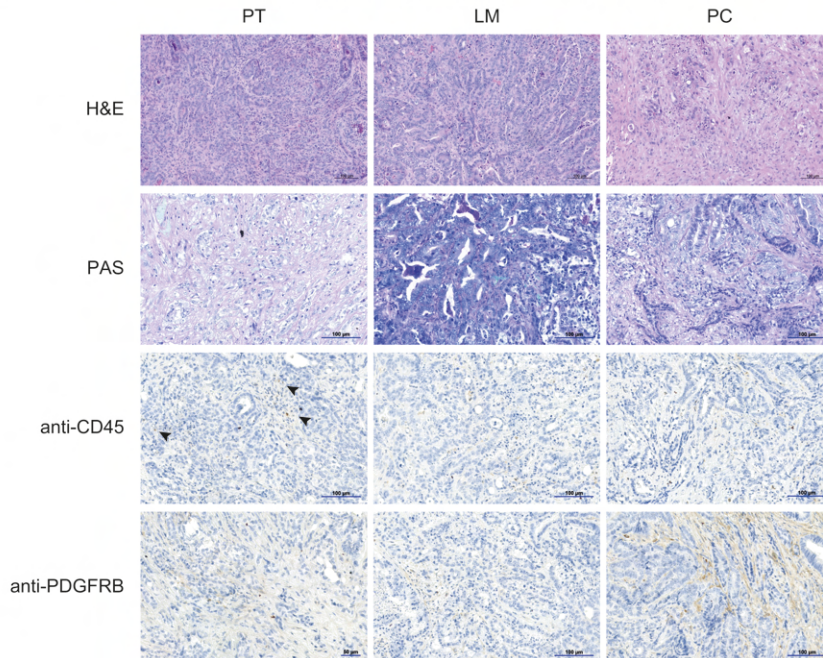

## **Supplementary Figure 1: A distinct cellular and functional landscape of murine primary CRC, liver metastases and peritoneal carcinomatosis**

**A.** Experimental overview for orthotopic subserosal APTKA transplantation. **B.** Representative images of APTKA organoids in matrigel domes during cultivation in vitro (left panel). Day six after passaging (middle panel). Single cells from APTKA organoids embedded in 10 $\mu$ l collagen dome before one day before surgical subserosal cecum transplantation into mice (right panel). **C.** Representative images of the surgical subserosal transplantation of APTKA tumour organoids into the cecum. 1. The cecum is exteriorized and embedded on a wet pad. The red dashes line marks the incision line of the cecum serosa. 2 After incision, the serosa is lifted and a deep subserosal pocket which can fully cover the 10 $\mu$ l collagen dome containing the APTKA organoid cells is formed (red dashed line). 3. Placement of the collagen dome (green dashed line) into the preformed subserosal pocket. 4. Deep implantation of the collagen dome for complete coverage by the cecum serosa. 5. Deeply implanted and fully covered collagen dome in the subserosal pocket. 6. Pre-cut rectangle of an adhesion barrier (yellow dashed line) is placed over the transplantation site and the cecum is wrapped with the film to secure the collagen dome and to prevent adhesions during wound healing. For detailed surgical steps, also see Movie S1. **D.** Schematic representation of the modified peritoneal carcinomatosis index (PCI). **E.** Laparoscopically analysed PCI eight weeks after orthotopic APTKA transplantation. **F.** Consensus molecular subtype of PT according to bulk transcriptome-based analyses. **G.** Violin plot depicting expression of scores for marker genes of iCMS2 and iCMS3. \*\*\*\*p<0.0001, Student's T-test. **H.** Absolute numbers for respective celltypes in PT, LM and PC. **I.** H&E staining, periodic acid–Schiff reaction (PAS) and IHC of murine PT, LM and PC for CD45 (immune cells) and PDGFRB (stromal cells). Histology and IHC was performed on 10 slides for each location.

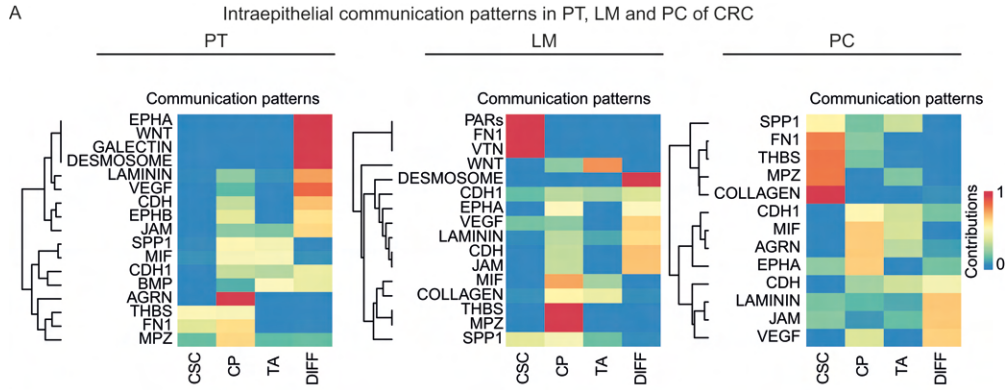

**B** CSC dependent L-R pairs in PT, LM and PC

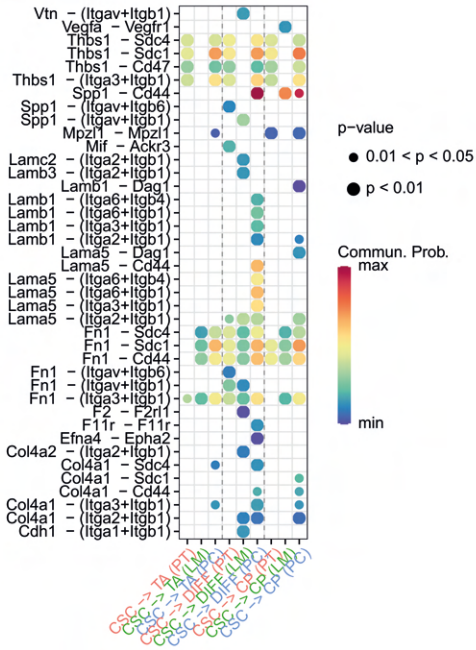

**Supplementary Figure 2: Location-specific metabolic reprogramming of the STEM compartment in multivisceral CRC**

**A.** Intraepithelial communication patterns between cellular subtypes. Heatmap shows the correspondence between the inferred patterns and cell subtypes, as well as signalling pathways. **B.** Location dependent comparison of the significant ligand-receptor pairs between CSC, CP, TA and DIFF. The dot color reflects communication probabilities and dot size represents computed p-values. Empty space means the communication probability is zero.





**Supplementary Figure 3: Inter-metastatic differences in stromal cell dynamics during CRC metastasis**

**A.** UMAP plot of CAFs subclusters identified by joint application of RCA and CCA and color-coded by cluster (left panel). UMAP plot of CAFs color-coded by location (right panel). **B.** Significantly increased communication probabilities for L-R pairs between CAFs and tumour cells in LM and PC. The colour represents the communication probability, dot size represents significance levels. **C.** Unbiased KEGG pathway enrichment analysis with differentially regulated genes ( $p$  adj.  $<0.05$ ) in PC CSCs compared to LM CSCs.

**A** Myeloid compartment - scRNA-seq

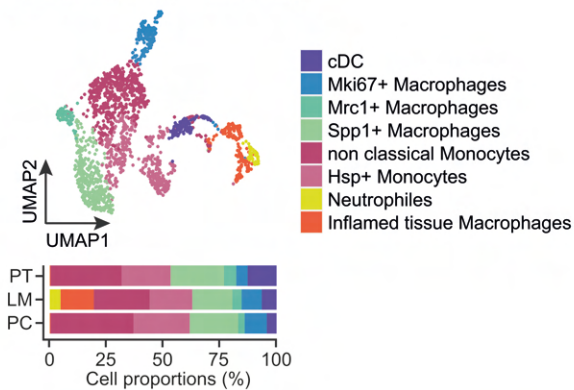

**B** Metastatic Mrc1+ macrophages - immuno suppressive phenotype

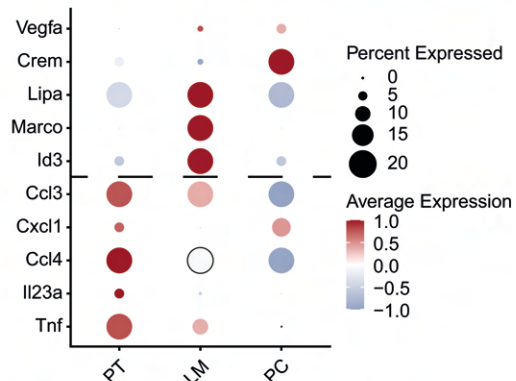

**C** Gating strategy - FACS sorting

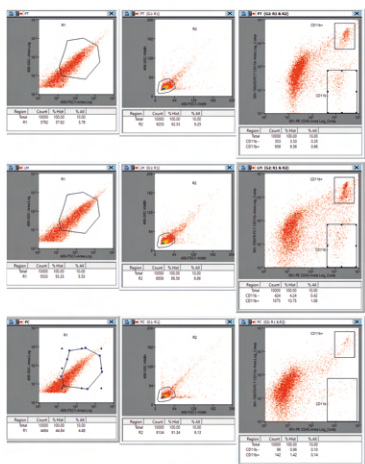

**D** Mitochondrial gene expression after QC

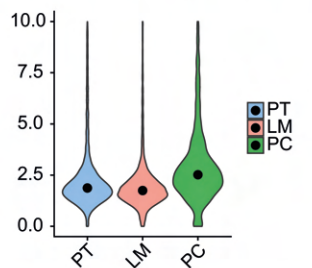

**E** nFeature after QC

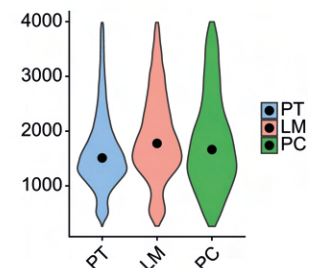

**G** Immune cell subtypes - scRNA-seq

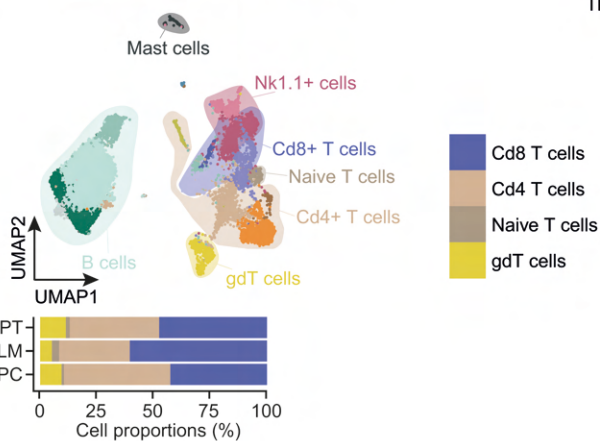

**F** T cell subtypes and NK cells - marker gene expression

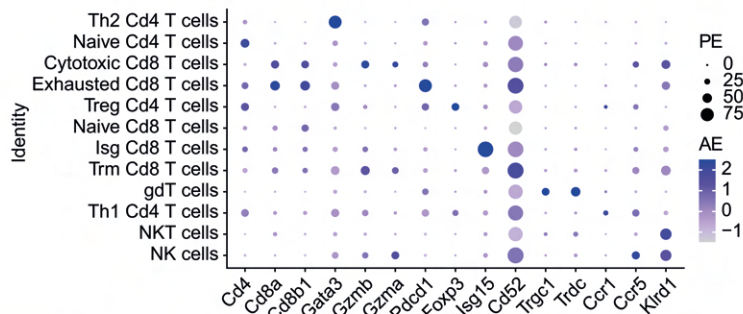

**H** OXPPOS activity

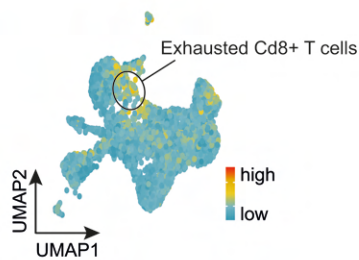

**I** Site specific OXPPOS activity in infiltrative T cell subtypes

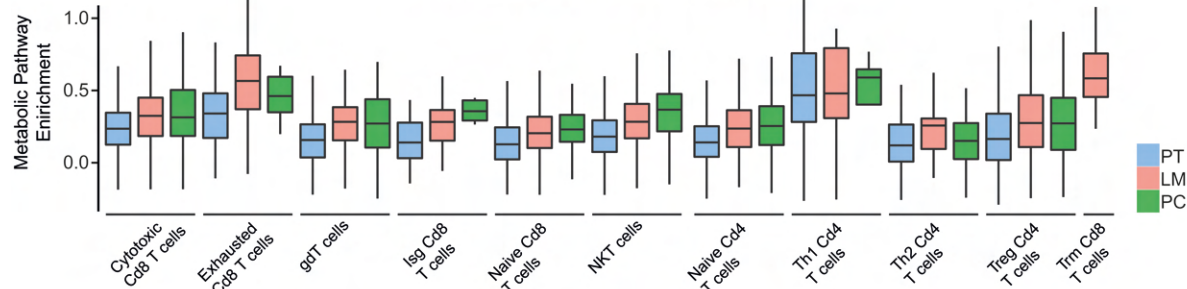

## Supplementary Figure 4: Location-specific anti-tumoural immunity during CRC metastasis

**A.** UMAP plot of myeloid cell subtypes identified by joint application of RCA and CCA and color-coded by cell type (upper panel). Proportions of myeloid cell subtypes in PT, LM and PC (lower panel) on average are shown. **B.** Expression of genes involved in polarization of *Mrc1*<sup>+</sup> macrophages from PT, LM and PC, centred to the average expression of each gene across all locations. The dot size represents the proportion of expressing cells in each cluster. **C.** Gating strategy for FACS guides isolation of CD45<sup>+</sup> / CD11b<sup>-</sup> immune cells from whole tumour single cell suspensions from PT (upper panel), LM (middle panel) and PC (lower panel). **D.** Mitochondrial gene expression after QC for each sample depicted as violin plot. **E.** nFeature after QC for each sample depicted as violin plot. **F.** Canonical marker gene expression for multiple T cell subtypes and NK cells centred to the average expression of each gene across cells. The dot size represents the proportion of expressing cells in each cluster. PE: percent expressed. AE: average expression. **G.** UMAP plot of B cells, mast cells, T cells and NK cells identified by joint application of RCA and CCA and color-coded by cell type (upper panel). Proportions of T cell subtypes in PT, LM and PC tissue (lower panel) on average are shown. **H.** UMAP of metabolic scores for OXPHOS in T cell subtypes. **I.** Metabolic activity analysis in the T cell compartment of PT, LM and PC on cell subtype level. Metabolic score depicted as boxplot.

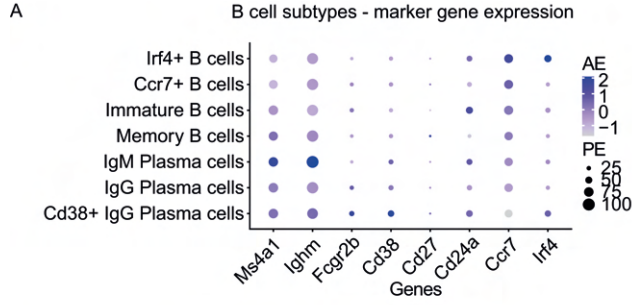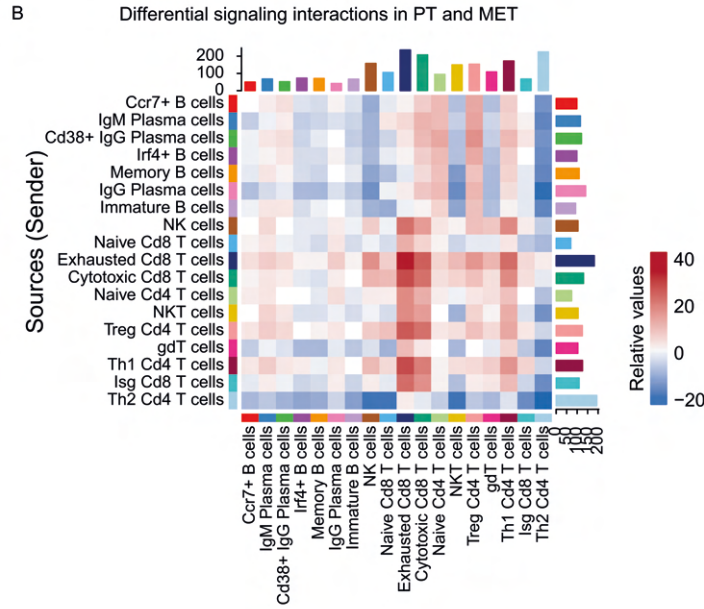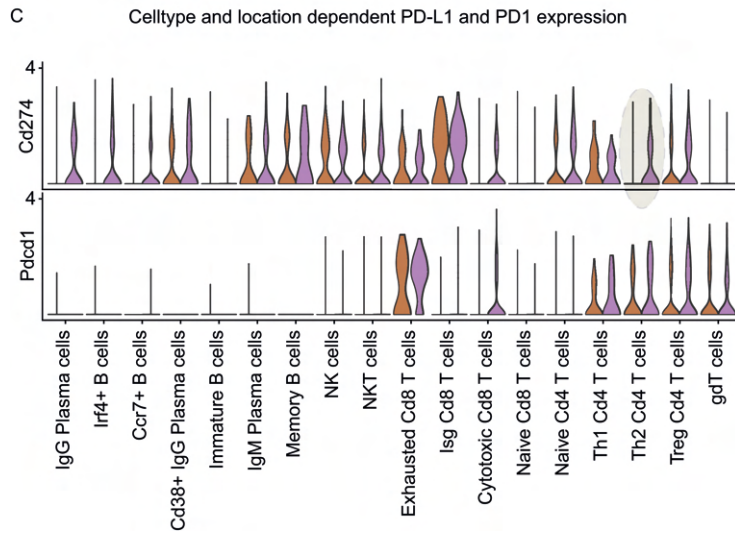



### **Supplementary Figure 5: Impairment of B cell networks in metastasized CRC**

**A.** Canonical marker gene expression for multiple B cell subtypes centred to the average expression of each gene across all cells. The dot size represents the proportion of expressing cells in each cluster. PE: percent expressed. AE: average expression. **B.** Heatmap depicting the differential number of interactions between B cell and T cell subtypes in PT and MET. Colours represent relative values. **C.** Expression level of *Cd274* and *Pdcd1* in B cell and T cell subtypes from PT and MET depicted as violin plot.

**A** Differential Th1 dependent PD-L1 signaling in LM and PC

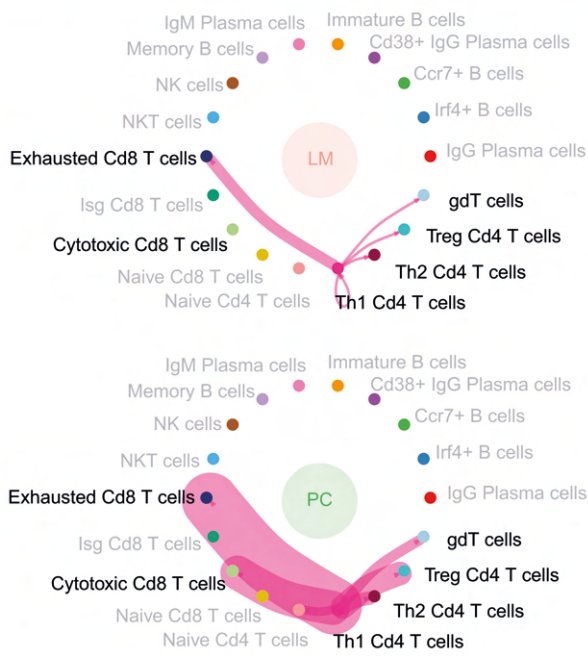

**B** Summarized communication pathways

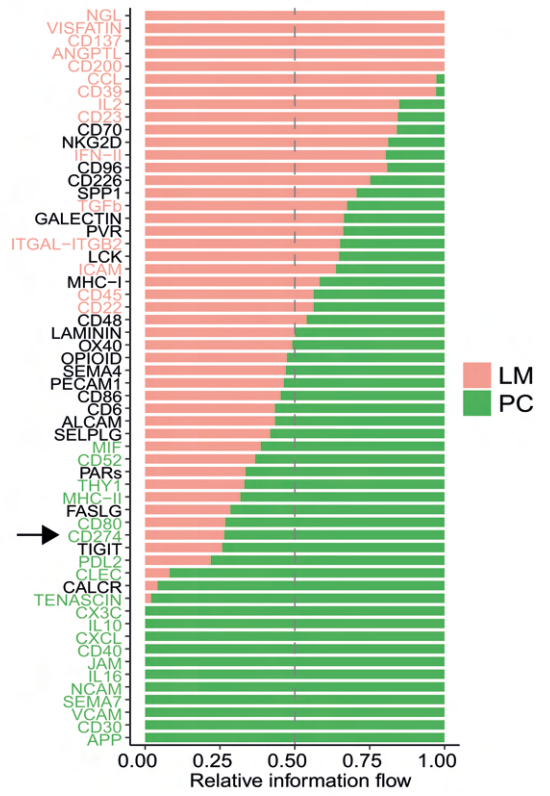

## **Supplementary Figure 6: Inter-metastatic alterations of adaptive immune responses multivisceral CRC**

**A.** Unbiased overall information flow of signalling networks by summarizing all the communication probabilities in respective network. All the significant signalling pathways were ranked based on their differences of overall information flow within the inferred networks between LM and PC. Signalling pathways coloured by red are more enriched in LM, pathways coloured by green were enriched in PC. **B.** Significant ligand-receptor pairs of the PD-L1 signalling network between Th1 CD4<sup>+</sup> T cells and other T cell subtypes in LM and PC. The edge width represents MHC-II dependent communication probability.

A Location dependent clustering of APTKA tissue

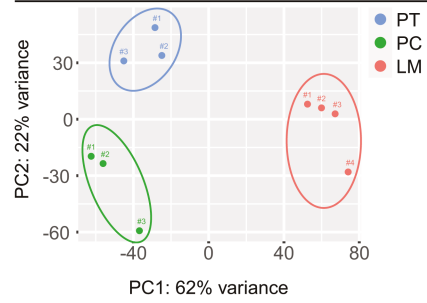

B Common differentially regulated genes in human and murine PC compared to PT

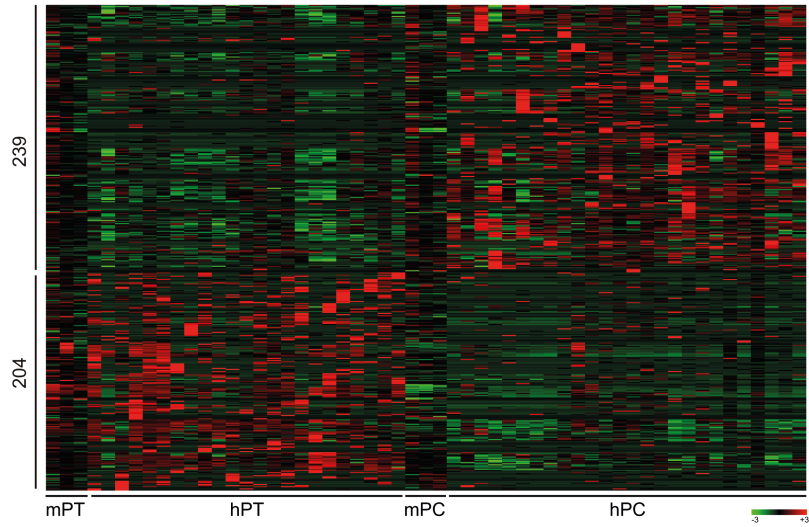

**Supplementary Figure 7: Murine multivisceral APTKA CRC mimics human stage IV CRC**

**A.** Principal component analysis (PCA) of three PT, three LM and four PC tissues show location dependent clustering of transcriptomes. **B.** Heatmap depicting common differentially regulated genes in human and murine PC compared to PT.  $p$  adj.  $<0.05$ .



**A** Location dependent gene set enrichment

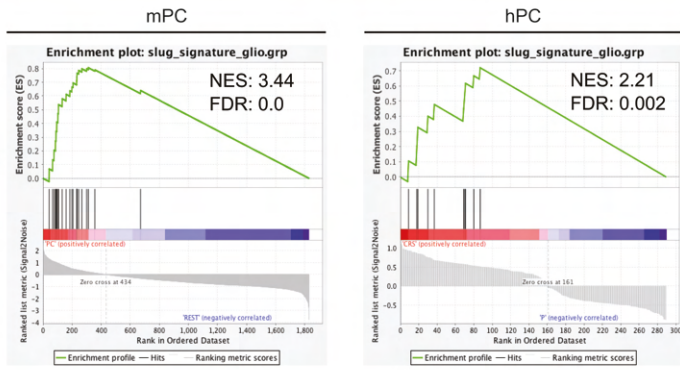

**B** Mesenchymal marker gene expression from IHC - quantification

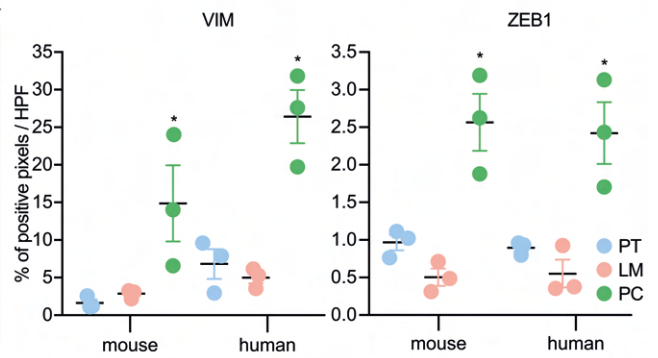

**C** Fibrosis in murine and human CRC - IHC

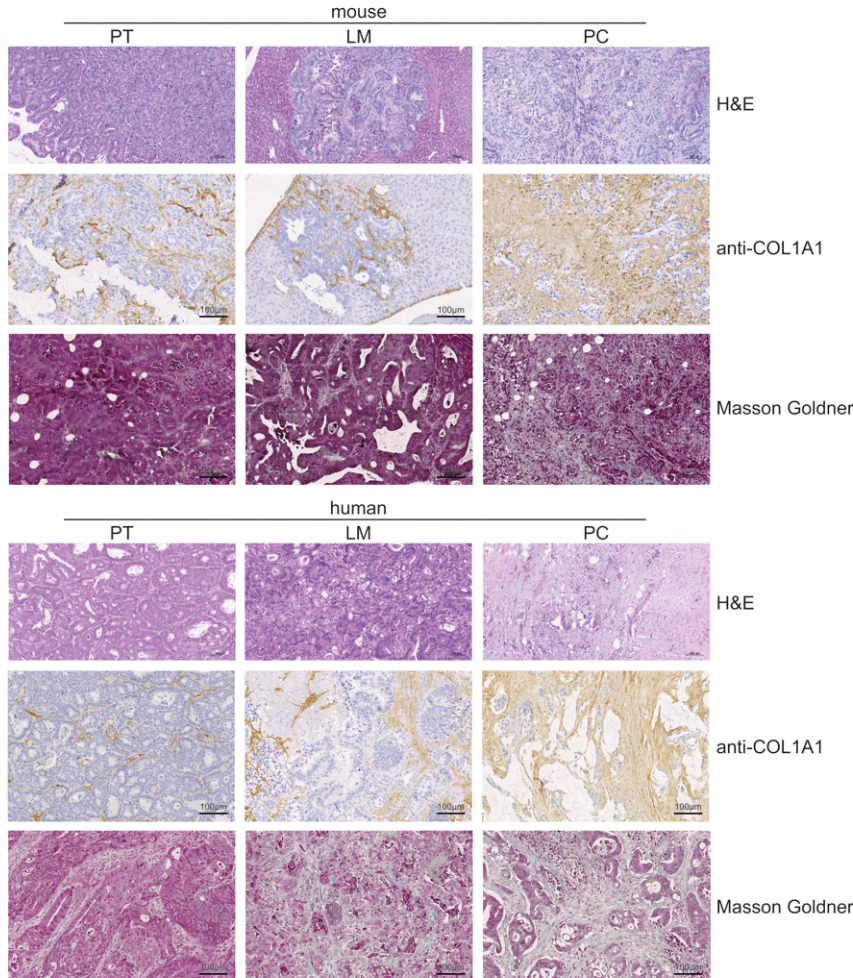

**D** human scRNA-Seq

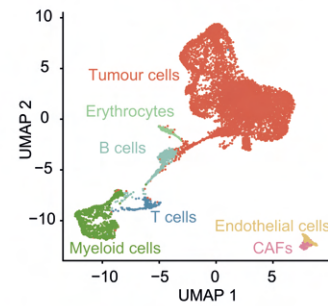

**E** human scRNA-Seq

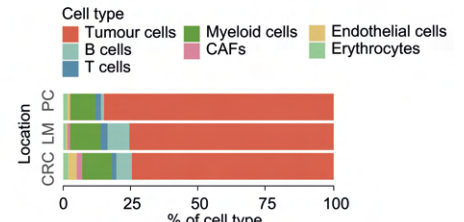

**F** human+mouse scRNA-Seq

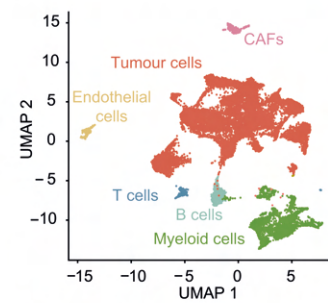

**G** human+mouse scRNA-Seq

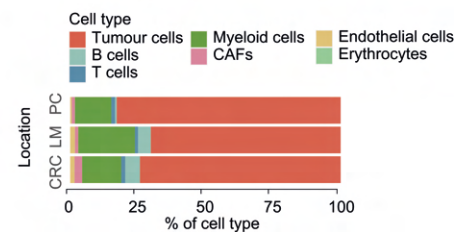

**Supplementary Figure 8: Peritoneal carcinomatosis is associated with a mesenchymal phenotype in human and murine CRC**

**A.** GSEA (Signal2Noise) with published Slug gene signature in murine and human PC. NES: normalized expression score. FDR: false discovery rate. **B.** Quantification of VIM and ZEB1 in IHC stainings of murine PT, LM and PC samples per HPF (n=3). \*  $p < 0.05$ , Student's T-test. **C.** Representative IHC of murine and human PT, LM and PC for COL1A, as well as Masson Goldner staining. **D.** UMAP plot of human CRC tissue identified by joint application of RCA and CCA and color-coded by cell type. **E.** Proportions of all cell types in human PT, LM and PC on average are shown. **F.** UMAP plot of integrated human and murine CRC identified by joint application of RCA and CCA and color-coded by cell type. **G.** Proportions of all cell types in integrated human and murine PT, LM and PC on average are shown.

A

TME reconstitution by intraperitoneal anti-PD1 therapy in PC

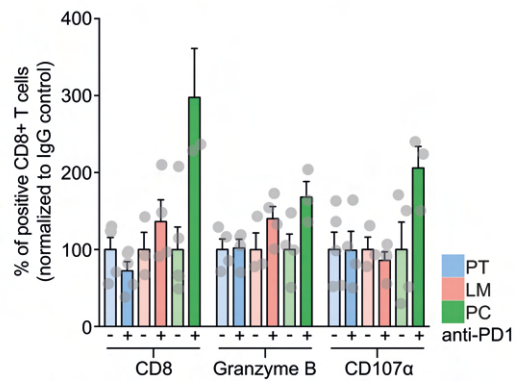

B

Reduction of intraperitoneal tumour mass by intraperitoneal anti-PD1 therapy

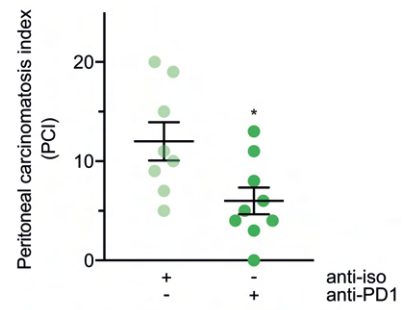

**Supplementary Figure 9: Intraperitoneal application of ICB reconstitutes effector T cell function in PC and emphasizes the importance of site-specific CRC therapy**

**A.** Quantification of changes in CD8<sup>+</sup> T cell regulation upon intraperitoneal anti-PD1 treatment by FACS. Normalized to IgG control, in %. n=3-5 per group. **B.** Quantification of macroscopic intraperitoneal tumour load (PCI) by diagnostic laparoscopy upon intraperitoneal anti-PD1 treatment (n=8 anti-iso, n=9 anti-PD1). \* p<0.05, Student's T-test.

**Table S1. Western Blot Antibody list.**

| <b>target</b> | <b>dilution</b> | <b>blocking</b>         | <b>company</b>               | <b>catalog number</b> |
|---------------|-----------------|-------------------------|------------------------------|-----------------------|
| ACTA2         | 1:1000          | 5 % BSA                 | Cell Signaling<br>Technology | #19245S               |
| ACC1          | 1:1000          | 5 % BSA                 | Cell Signaling<br>Technology | #3676                 |
| ACTB          | 1:1000          | 5 % skim milk<br>powder | Cell Signaling<br>Technology | #4970S                |
| COL1A1        | 1:1000          | 5 % BSA                 | Cell Signaling<br>Technology | #81375S               |
| CDHE          | 1:1000          | 5 % BSA                 | Cell Signaling<br>Technology | #14472S               |
| FAS           | 1:1000          | 5 % BSA                 | Cell Signaling<br>Technology | #3180                 |
| LDHA          | 1:1000          | 5 % BSA                 | Cell Signaling<br>Technology | #3582                 |
| LOX           | 1:1000          | 5 % skim milk<br>powder | Cell Signaling<br>Technology | #58135S               |
| CDHN          | 1:1000          | 5 % BSA                 | Cell Signaling<br>Technology | #13116S               |
| PDHA1         | 1:1000          | 5 % BSA                 | Cell Signaling<br>Technology | #3205                 |
| VIM           | 1:1000          | 5 % BSA                 | Cell Signaling<br>Technology | #5741S                |



|      |        |         |                              |         |
|------|--------|---------|------------------------------|---------|
| ZEB1 | 1:1000 | 5 % BSA | Cell Signaling<br>Technology | #70512S |
|------|--------|---------|------------------------------|---------|

**Table S2. IHC Antibody list.**

| <b>target</b> | <b>dilution</b> | <b>antigen retrieval</b> | <b>company</b> | <b>catalog number</b> |
|---------------|-----------------|--------------------------|----------------|-----------------------|
| ACTA2         | 1:320           | citrate                  | Cell Signaling | #19245S               |
| b220          | 1:100           | citrate                  | eBioscience    | #14-0452-82           |
| CD45          | 1:100           | citrate                  | Cell Signaling | # 70257S              |
| COL1A1        | 1:100           | citrate                  | Cell Signaling | #81375S               |
| LOX           | 1:1000          | citrate                  | Genetex        | #GTX03201             |
| PAS Kit       | -               | -                        | Abcam          | #AB150680             |
| PDGFRB        | 1:150           | citrate                  | Cell Signaling | #3169S                |
| VIM           | 1:100           | citrate                  | Cell Signaling | #5741S                |
| ZEB1          | 1:100           | citrate                  | Cell Signaling | #70512S               |

**Table S3. Flow cytometry Antibody list.**

| <b>target</b> | <b>fluorochrome</b>  | <b>company</b>  | <b>catalog number</b> |
|---------------|----------------------|-----------------|-----------------------|
| CD45          | Alexa Fluor 700      | Biolegend       | 103128                |
| CD3           | Brilliant Violet 421 | Biolegend       | 100227                |
| CD3           | Brilliant Violet 785 | Biolegend       | 100231                |
| CD3           | biotin               | Biolegend       | 100304                |
| CD4           | PerCP Cy5.5          | Biolegend       | 100434                |
| CD4           | Brilliant Violet 711 | Biolegend       | 100550                |
| CD8           | PE Dazzle 594        | Biolegend       | 100762                |
| Foxp3         | Alexa Fluor 488      | Biolegend       | 320012                |
| IFN $\gamma$  | PE/Cy7               | Biolegend       | 505826                |
| IL-17         | PE                   | Biolegend       | 506933                |
| CD19          | Brilliant Violet 650 | Biolegend       | 145517                |
| CD19          | biotin               | Biolegend       | 101504                |
| b220          | Alexa Fluor 488      | Biolegend       | 103225                |
| b220          | PE Dazzle 594        | Biolegend       | 103204                |
| F4/80         | Alexa Fluor 488      | BioRad          | MCA497A488T           |
| CD64          | Brilliant Violet 421 | Biolegend       | 139309                |
| CD11b         | Brilliant Violet 711 | Biolegend       | 121631                |
| CD11c         | Brilliant Violet 785 | Biolegend       | 117336                |
| NK1.1         | Brilliant Violet 605 | Biolegend       | 108736                |
| I-A/I-E       | Brilliant Violet 510 | Biolegend       | 107636                |
| IL-10         | Vio515               | Miltenyi Biotec | 130-108-097           |
| Gr-1          | biotin               | Biolegend       | 108404                |

**Table S4. Gene score list.**

apCAF score:

"Cd74", "H2-Aa", "H2-Ab1", "H2-Eb1", "S100a4", "Slpi", "Saa3", "Irf5"

endothelial angiogenesis score:

"Lama4", "Klf6", "Gm1673", "Col14a1", "Hspg2", "Sh3bgrl3", "S100a6", "Col4a2",  
"Col4a1", "Rhob", "Lgals1", "Pfn1", "Col15a1", "Serpine1", "Htra1", "Sparc"

Endothelial antigen presentation score:

"Cd74", "Egr1", "Cebpd", "H2-Eb2", "H2-Ea", "Igha", "Cldn5", "Itm2b", "H2-D1",  
"H2-Q1", "H2-Q2", "H2-Q4", "H2-Q6", "H2-Q7", "H2-Q10", "Enpp2", "Jam2",  
"Sparcl1", "Zc3hav1", "Sertad1", "Jchain", "Cdkn1a", "H2-T24", "H2-T23", "H2-  
T22", "Gm11127", "Gm7030", "H2-T10", "Gm8909", "H2-T3", "H2-M10.2", "H2-  
M10.1", "H2-M10.3", "H2-M10.4", "H2-M11", "H2-M9", "H2-M1", "H2-M10.5", "H2-  
M10.6", "H2-M3", "H2-M2", "H2-M5", "H2-K1", "Socs3", "Cd320", "Irf1", "Fabp5",  
"Igfbp2", "Klf4", "Gadd45b"

iCMS2\_up:

"Vma21", "Pgrmc1", "Nsdhl", "Gabre", "Lamp2", "Spryd7", "Kpna3", "Tbc1d4",  
"Rnaseh2b", "Uchl3", "Myc", "Nkap", "Edn1", "Ccdc85b", "Rnf113a1", "Gm4737",  
"Pak1ip1", "C1galt1c1", "Dab2", "Spata13", "Micu2", "Ndfip2", "Prkdc", "Bcap31",  
"Commd6", "Mcts1", "Tspan6", "Farp1", "Rpia", "Zdhhc9", "Gm7102", "Ldhb",  
"Gal", "Rida", "Ipo5", "Rrs1", "Nit2", "Rbmx2", "Hsd17b10", "Timm8a2",  
"Timm8a1", "Ubac2", "Gnpda1", "Gla", "Ftl1-ps1", "Utp14a", "Timp3", "Pdpk1",  
"Sox4", "Naa10", "Laptm4b", "Slc7a6", "Hibadh", "Serpine2", "Vbp1", "Nek3",  
"Utp4", "Lage3", "Mrpl13", "Cops5", "Preli3b", "Sinhcaf", "Rrp9", "Utp23", "Nip7",

"AY761185", "Defa21", "Defa23", "Defa35", "Defa25", "Defa38", "Defa30",  
"Defa22", "Defa31", "Defa41", "Defa40", "Defa3", "Defa5", "Defa27", "Defa29",  
"Defa2", "Defa33", "Defa36", "Defa42", "Defa20", "Defa32", "Defa37", "Defa28",  
"Defa43", "Defa26", "Defa17", "Defa34", "Defa39", "Defa24", "Gtf2f2", "Eif3h",  
"Rubcni", "Fundc2", "Pqbp1", "Utp14b", "Cdc16", "C2", "Tsc22d1", "Med30",  
"Arl4a", "Exosc5", "Proser1", "Sucla2", "Eif3e", "Dkc1", "Neu1", "Upf3a", "Ddah2",  
"Dnajc15", "Zc3h13", "Cyp2s1", "Imp2l", "Capza2", "Trap1", "Dcaf13", "Atp5e",  
"Cyb5b", "Pcid2", "Bop1", "Slc52a2", "Cdk4", "Slc3a2", "Top1mt", "Nhirc3",  
"Timm17b", "Malsu1", "Krt23", "Fmr1", "Ccl20", "1110038F14Rik", "Emd",  
"Med4", "Txlng", "Prpf6", "Strap", "Tcf7", "Pan3", "Irs2", "Plin2", "Arfgap1",  
"Uckl1", "Cdk8", "Mrps31", "Bcl2l1", "Aspscr1", "Plagl2", "Tpd52l2", "Nudt4",  
"Avl9", "Fnta", "Rpusd1", "Rnf113a2", "Fbl", "Cars2", "Dnajc5", "Scand1", "Nae1",  
"Phf20", "Cdk5rap1", "Ereg", "Igbp1", "Prox1", "Rab20", "Nkd1", "Qprt", "Pdrp1",  
"Gpsm2", "Zfp503", "Osbp1", "Eepd1", "Pofut1", "Mplkip", "Zfand1", "Mapre1",  
"Asxl1", "Rnf170", "Gm45692", "Chmp4c", "Fggy", "Uchl4", "Helz2", "Supt20",  
"Arfrp1", "Ogfr", "Prr15", "Slc38a5", "Tpx2", "Rnf6", "Ergic3", "Epb41l5", "Trib3",  
"Dido1", "Ythdf1", "Ptpro", "Rp9", "Edem2", "Mrgbp", "Ahcy", "Cpne1", "H13",  
"Las1l", "Nfs1", "Slc20a2", "Epb41l1", "Abracl", "Psm7", "Gtf3a", "Scarb1",  
"Eif6", "Dpep1", "Armc1", "Rbm39", "Prss23", "Commd7", "Adrm1", "Gm9774",  
"Pigu", "Csnk2a2", "Dynlrb1", "Cxcl14", "Ctsh", "Gid8", "Trpc4ap", "Golga7",  
"Slc29a1", "Tdgf1", "Areg", "Rnf114", "Ctsa", "Snrpb2", "Pet117", "Chchd7",  
"Rab5if", "Rab22a", "Naa20", "Ano9", "Smim26", "Tomm34", "Ftl1", "Rpn2",  
"Slc5a6", "Psph", "Rtf2", "Cse1l", "Hus1", "Fermt1", "Stx16", "Rb1cc1", "Lypla1",



"Chd6", "Fn1", "Ctnnb1", "Ascl2", "Aurka", "Uba2", "Nelfcd", "Slc2a8", "Stk4",  
"Zmynd8", "Serinc3", "Rae1", "Cct6a", "Atp6v1h", "Gm20716", "Dpm1", "Stau1",  
"Txndc9", "Pcif1", "Gm27027", "Alkbh3", "Snrpb", "Cyp2w1", "Acot8", "Pmepa1",  
"Ccdc34", "Cebpb", "Atp9a", "Ggh", "Abhd12", "Cox19", "Arhgap45",  
"1700037H04Rik", "Plcb4", "Rnf43", "Pcmd2", "Gtf2ird1", "Axin2", "Xrn2",  
"Slc35c2", "Tbrg4", "Ddx27", "Cdc25b", "Eif2s2", "Rprd1b", "Ncoa3", "Ifitm6",  
"Gpcpd1", "Pdp1", "Pard6b", "Ndr3", "Dnttip1", "Pepd", "Vapb", "Mrps17",  
"Arid3a", "Esf1", "Ift52", "Blcap", "Ywhab", "Mrps24", "Trp53rka", "Trp53rkb",  
"Pfdn4", "Prap1", "Nxt1", "Ube2c", "Ralgapb", "Oser1", "Pltp", "Tnnc2", "Pex16",  
"Raly"

iCMS3\_up:

"Egln3", "Lpin1", "Try4", "Try5", "Try10", "Prss3", "Gm5771", "Gm10334",  
"Prss1", "Prss2", "Dpysl2", "Tymp", "Bnip3l", "9530003J23Rik", "F3", "Clu",  
"Ctnnbip1", "Fut8", "Col16a1", "Atf3", "Me1", "Krt7", "Lipg", "Myof", "Pfkp",  
"Klk11", "Mmp7", "Cdc42ep1", "Tm4sf4", "Dusp4", "Sytl1", "Tff1", "Sez6l2",  
"Depp1", "Rab15", "Adam9", "Ndufa4l2", "Tff2", "Rasl11a", "Ramp1", "Eps8l1",  
"Agrn", "Ppp6r1", "S100a13", "Anxa1", "Stim2", "Kdelr3", "Atp1b1", "Rgs10",  
"Trim29", "Cd55b", "Cd55", "Pmp22", "Sdr16c5", "Muc5ac", "Dnajc10", "Rgs2",  
"Aqp3", "Tmem92", "Serpib5", "Tpgs1", "Car9", "Cfd", "Tnfrsf26", "Tnfrsf22",  
"Tnfrsf23", "Muc3"

## **Supplementary Materials**

Supplementary Figure 1: A distinct cellular and functional landscape of murine primary CRC, liver metastases and peritoneal carcinomatosis

Supplementary Figure 2: Location-specific metabolic reprogramming of the STEM compartment in multivisceral CRC

Supplementary Figure 3: Inter-metastatic differences in stromal cell dynamics during CRC metastasis

Supplementary Figure 4: Location-specific anti-tumoural immunity during CRC metastasis

Supplementary Figure 5: Impairment of B cell networks in metastasized CRC

Supplementary Figure 6: Inter-metastatic alterations of adaptive immune responses multivisceral CRC

Supplementary Figure 7: Murine multivisceral APTKA CRC mimics human stage IV CRC

Supplementary Figure 8: Peritoneal carcinomatosis is associated with a mesenchymal phenotype in human and murine CRC

Supplementary Figure 9: Intraperitoneal application of ICB reconstitutes effector T cell function in PC and emphasizes the importance of site-specific CRC therapy

Table S1. Western Blot Antibody list.

Table S2. IHC Antibody list.

Table S3. Flow cytometry Antibody list.

Table S4. Gene score list.

Movie S1: Orthotopic surgical transplantation of APTKA organoid cells under the serosa of the murine cecum.

Movie S2: Diagnostic laparoscopy eight weeks after orthotopic surgical transplantation of APTKA organoid cells depicting the development of primary tumours, liver metastases and peritoneal carcinomatosis.
